# Supplementary material
Source: PubMed Central journal article supplement (PMC5042677)
Supplement: ASN.2015121377SupplementaryData.pdf [file ASN.2015121377SupplementaryData.pdf]

**Supplemental Figures:**

**Supplemental figure 1:** Flow diagram of cohort assembly of a 1:1 propensity score matched cohort of new users of PPI (n=20,270) and new users of H2 blockers (n=20,270)

**Supplemental figure 2:** Flow diagram of cohort assembly of a 1:1 propensity score matched cohort of new PPI users (n=173,321) and a control group (n=173,321)

Supplemental table 1: Association of PPI and risk of kidney outcomes in Univariate Cox regression models.

|                                      | Hazard Ratio | Confidence interval |
|--------------------------------------|--------------|---------------------|
| eGFR<60<br>ml/min/1.73m <sup>2</sup> | 1.33         | 1.29-1.37           |
| Incident chronic<br>kidney disease   | 1.41         | 1.35-1.48           |
| Doubling of serum<br>creatinine      | 1.71         | 1.59-1.84           |
| Greater than 30%<br>decline in eGFR  | 1.43         | 1.38-1.48           |
| ESRD                                 | 2.17         | 1.35-3.48           |
| ESRD or >50%<br>decline in eGFR      | 1.65         | 1.54-1.76           |

Supplemental table 2: Baseline characteristics of a 1:1 propensity score matched cohort of new users of H2 blockers (n=20,270) and new proton pump inhibitor users (n=20,270).

|                                                    | H2 blockers<br>(n=20,270) | PPI<br>(n=20,270) | Standardized<br>difference |      |
|----------------------------------------------------|---------------------------|-------------------|----------------------------|------|
| Age (SD)                                           | 55.40 (12.81)             | 55.42 (12.60)     | 0.00                       |      |
| Baseline eGFR in<br>ml/min/1.73m <sup>2</sup> (SD) | 86.98 (15.88)             | 87.08 (15.94)     | 0.00                       |      |
| Race                                               | White<br>(%)              | 15,937 (78.62)    | 15,934 (78.61)             | 0.00 |
|                                                    | Black<br>(%)              | 3,784 (18.67)     | 3,778 (18.64)              | 0.00 |
|                                                    | Other<br>(%)              | 549 (2.71)        | 558 (2.75)                 | 0.00 |
| Sex                                                | Male (%)                  | 18,929 (93.38)    | 18,935 (93.41)             | 0.00 |
|                                                    | Female<br>(%)             | 1,341 (6.62)      | 1,335 (6.59)               | 0.00 |
| Diabetes mellitus<br>(%)                           | 8,923 (44.02)             | 8,862 (43.72)     | 0.01                       |      |
| Hypertension (%)                                   | 15,814 (78.02)            | 15,857 (78.23)    | 0.01                       |      |
| Chronic lung<br>disease (%)                        | 7,951 (39.23)             | 7,857 (38.76)     | 0.01                       |      |
| Peripheral artery<br>disease (%)                   | 5,009 (24.71)             | 5,051 (24.92)     | 0.00                       |      |
| Cardiovascular<br>disease (%)                      | 8,459 (41.73)             | 8,430 (41.59)     | 0.00                       |      |
| Cerebrovascular<br>disease (%)                     | 4,596 (22.67)             | 4,595 (22.67)     | 0.00                       |      |
| Dementia (%)                                       | 5,058 (24.95)             | 5,105 (25.19)     | 0.01                       |      |
| Hyperlipidemia (%)                                 | 14,785 (72.94)            | 14,923 (73.62)    | 0.02                       |      |
| Hepatitis C (%)                                    | 1,198 (5.91)              | 1,146 (5.65)      | 0.01                       |      |
| HIV (%)                                            | 55 (0.27)                 | 52 (0.26)         | 0.00                       |      |
| GERD (%)                                           | 3,767 (18.58)             | 3,759 (18.54)     | 0.00                       |      |
| Upper GI tract<br>bleeding (%)                     | 246 (1.21)                | 267 (1.32)        | 0.01                       |      |
| Ulcer disease (%)                                  | 666 (3.29)                | 664 (3.28)        | 0.00                       |      |
| H. Pylori infection<br>(%)                         | 22 (0.11)                 | 19 (0.09)         | 0.01                       |      |
| Barrett's esophagus<br>(%)                         | 15 (0.07)                 | 20 (0.10)         | 0.01                       |      |
| Achalasia (%)                                      | 1 (0.00)                  | 3 (0.01)          | 0.01                       |      |
| Stricture (%)                                      | 33 (0.16)                 | 43 (0.21)         | 0.01                       |      |
| Esophageal<br>adenocarcinoma<br>(%)                | 3 (0.01)                  | 2 (0.01)          | 0.00                       |      |

Supplemental table 3: Baseline characteristics of a 1:1 propensity score matched cohort of new users of PPI (n=173,321) and matched controls (n=173,321).

|                                                    | Control<br>(n=173,321) | PPI<br>(n=173,321) | Standardized<br>difference |      |
|----------------------------------------------------|------------------------|--------------------|----------------------------|------|
| Age (SD)                                           | 57.03 (12.71)          | 56.85 (11.85)      | 0.00                       |      |
| Baseline eGFR in<br>ml/min/1.73m <sup>2</sup> (SD) | 86.57 (16.02)          | 86.56 (15.67)      | 0.00                       |      |
| Race                                               | White                  | 136,827 (78.94)    | 137,174 (79.14)            | 0.00 |
|                                                    | Black                  | 32,440 (18.72)     | 32,018 (18.47)             | 0.01 |
|                                                    | Other                  | 4,054 (2.34)       | 4,129 (2.38)               | 0.00 |
| Sex                                                | Male                   | 161,294 (93.06)    | 161,259 (93.04)            | 0.00 |
|                                                    | Female                 | 12,027 (6.94)      | 12,062 (6.96)              | 0.00 |
| Diabetes mellitus<br>(%)                           | 71,342 (41.16)         | 72,309 (41.72)     | 0.01                       |      |
| Hypertension (%)                                   | 136,355 (78.67)        | 136,782 (78.92)    | 0.01                       |      |
| Chronic lung<br>disease (%)                        | 66,505 (38.37)         | 66,955 (38.63)     | 0.01                       |      |
| Peripheral artery<br>disease (%)                   | 29,766 (17.17)         | 31,311 (18.07)     | 0.02                       |      |
| Cardiovascular<br>disease (%)                      | 71,435 (41.22)         | 71,807 (41.43)     | 0.00                       |      |
| Cerebrovascular<br>disease (%)                     | 25,049 (14.45)         | 26,457 (15.26)     | 0.02                       |      |
| Dementia (%)                                       | 30,874 (17.81)         | 32,380 (18.68)     | 0.02                       |      |
| Hyperlipidemia (%)                                 | 126,572 (73.03)        | 127,463 (73.54)    | 0.01                       |      |
| Hepatitis C (%)                                    | 15,321 (8.84)          | 14,892 (8.59)      | 0.01                       |      |
| HIV (%)                                            | 714 (0.41)             | 678 (0.39)         | 0.00                       |      |
| GERD (%)                                           | 88,721 (51.19)         | 86,804 (50.08)     | 0.02                       |      |
| Upper GI tract<br>bleeding (%)                     | 7,459 (4.30)           | 7,898 (4.56)       | 0.01                       |      |
| Ulcer disease (%)                                  | 23,984 (13.84)         | 26,228 (15.13)     | 0.04                       |      |
| H. Pylori infection<br>(%)                         | 3,329 (1.92)           | 4,052 (2.34)       | 0.03                       |      |
| Barrett's esophagus<br>(%)                         | 1,981 (1.14)           | 3,207 (1.85)       | 0.06                       |      |
| Achalasia (%)                                      | 201 (0.12)             | 214 (0.12)         | 0.00                       |      |
| Stricture (%)                                      | 1,893 (1.09)           | 2,299 (1.33)       | 0.02                       |      |
| Esophageal<br>adenocarcinoma<br>(%)                | 251 (0.14)             | 291 (0.17)         | 0.01                       |      |

Supplemental table 4: Risk of renal events in models additionally adjusted for number of eGFR measurements prior to cohort entry.

| Outcome                                                                                                                                                                                                                                                                                                                                                                                                                          |                                         | H2 blockers<br>(n=20,270) | PPI<br>(n=173,321)   |
|----------------------------------------------------------------------------------------------------------------------------------------------------------------------------------------------------------------------------------------------------------------------------------------------------------------------------------------------------------------------------------------------------------------------------------|-----------------------------------------|---------------------------|----------------------|
| eGFR measurement                                                                                                                                                                                                                                                                                                                                                                                                                 | Average number of eGFR measurement (SD) | 4.72 (5.73)               | 6.93 (7.21)          |
| Incident eGFR<60 ml/min/1.73m <sup>2</sup>                                                                                                                                                                                                                                                                                                                                                                                       | Hazard Ratio (Confidence interval)      | 1                         | 1.18<br>(1.15, 1.22) |
| Incident chronic kidney disease                                                                                                                                                                                                                                                                                                                                                                                                  | Hazard Ratio (Confidence interval)      | 1                         | 1.24<br>(1.19, 1.30) |
| Doubling of serum creatinine                                                                                                                                                                                                                                                                                                                                                                                                     | Hazard Ratio (Confidence interval)      | 1                         | 1.52<br>(1.41, 1.64) |
| Greater than 30% decline in eGFR                                                                                                                                                                                                                                                                                                                                                                                                 | Hazard Ratio (Confidence interval)      | 1                         | 1.28<br>(1.24, 1.33) |
| End stage renal disease                                                                                                                                                                                                                                                                                                                                                                                                          | Hazard Ratio (Confidence interval)      | 1                         | 1.89<br>(1.17, 3.06) |
| End stage renal disease or >50% decline in eGFR                                                                                                                                                                                                                                                                                                                                                                                  | Hazard Ratio (Confidence interval)      | 1                         | 1.45<br>(1.36, 1.55) |
| Hazard Ratios were obtained from Cox models adjusted for number of eGFR measurement, baseline eGFR, age, race, gender, diabetes mellitus, hypertension, cardiovascular disease, peripheral artery disease, cerebrovascular disease, chronic lung disease, hepatitis C, HIV, dementia, GERD, upper GI tract bleeding, ulcer disease, H. Pylori infection, Barrett's esophagus, achalasia, stricture and esophageal adenocarcinoma |                                         |                           |                      |

Supplemental table 5a: Risk of renal events in models additionally adjusted for use of NSAIDs prior to cohort entry.

| Outcome                                                                                                                                                                                                                                                                                                                                                                                                                                                                                                                  |                                       | H2 blockers<br>(n=20,270) | PPI<br>(n=173,321)   |
|--------------------------------------------------------------------------------------------------------------------------------------------------------------------------------------------------------------------------------------------------------------------------------------------------------------------------------------------------------------------------------------------------------------------------------------------------------------------------------------------------------------------------|---------------------------------------|---------------------------|----------------------|
| NSAIDs                                                                                                                                                                                                                                                                                                                                                                                                                                                                                                                   | Number of patients with NSAIDs (%)    | 8,697 (42.91)             | 89,999 (51.93)       |
| Incident eGFR<60 ml/min/1.73m <sup>2</sup>                                                                                                                                                                                                                                                                                                                                                                                                                                                                               | Hazard Ratio<br>(Confidence interval) | 1                         | 1.22<br>(1.18, 1.26) |
| Incident chronic kidney disease                                                                                                                                                                                                                                                                                                                                                                                                                                                                                          | Hazard Ratio<br>(Confidence interval) | 1                         | 1.28<br>(1.22, 1.34) |
| Doubling of serum creatinine                                                                                                                                                                                                                                                                                                                                                                                                                                                                                             | Hazard Ratio<br>(Confidence interval) | 1                         | 1.53<br>(1.42, 1.65) |
| Greater than 30% decline in eGFR                                                                                                                                                                                                                                                                                                                                                                                                                                                                                         | Hazard Ratio<br>(Confidence interval) | 1                         | 1.32<br>(1.27, 1.36) |
| End stage renal disease                                                                                                                                                                                                                                                                                                                                                                                                                                                                                                  | Hazard Ratio<br>(Confidence interval) | 1                         | 1.99<br>(1.23, 3.23) |
| End stage renal disease or >50% decline in eGFR                                                                                                                                                                                                                                                                                                                                                                                                                                                                          | Hazard Ratio<br>(Confidence interval) | 1                         | 1.47<br>(1.38, 1.57) |
| <p>Hazard Ratios were obtained from Cox models adjusted for use of NSAIDs, baseline eGFR, age, race, gender, diabetes mellitus, hypertension, cardiovascular disease, peripheral artery disease, cerebrovascular disease, chronic lung disease, hepatitis C, HIV, dementia, GERD, upper GI tract bleeding, ulcer disease, H. Pylori infection, Barrett's esophagus, achalasia, stricture and esophageal adenocarcinoma<br/>NSAIDs exposure was defined as use of any NSAIDs for 30 days or more before cohort entry.</p> |                                       |                           |                      |

Supplemental table 5b: Risk of renal events in models additionally adjusted for use of NSAIDs after cohort entry.

| Outcome                                                                                                                                                                                                                                                                                                                                                                                                                                                                                                                 |                                    | H2 blockers<br>(n=20,270) | PPI<br>(n=173,321) |
|-------------------------------------------------------------------------------------------------------------------------------------------------------------------------------------------------------------------------------------------------------------------------------------------------------------------------------------------------------------------------------------------------------------------------------------------------------------------------------------------------------------------------|------------------------------------|---------------------------|--------------------|
| Incident eGFR<60 ml/min/1.73m <sup>2</sup>                                                                                                                                                                                                                                                                                                                                                                                                                                                                              | Number of patients with NSAIDs (%) | 6,272 (30.94)             | 44,236 (25.52)     |
|                                                                                                                                                                                                                                                                                                                                                                                                                                                                                                                         | Hazard Ratio (Confidence interval) | 1                         | 1.22 (1.18, 1.26)  |
| Incident chronic kidney disease                                                                                                                                                                                                                                                                                                                                                                                                                                                                                         | Number of patients with NSAIDs (%) | 6,329 (31.22)             | 44,487 (25.67)     |
|                                                                                                                                                                                                                                                                                                                                                                                                                                                                                                                         | Hazard Ratio (Confidence interval) | 1                         | 1.28 (1.23, 1.34)  |
| Doubling of serum creatinine                                                                                                                                                                                                                                                                                                                                                                                                                                                                                            | Number of patients with NSAIDs (%) | 6,417 (31.66)             | 44,994 (25.96)     |
|                                                                                                                                                                                                                                                                                                                                                                                                                                                                                                                         | Hazard Ratio (Confidence interval) | 1                         | 1.52 (1.41, 1.64)  |
| Greater than 30% decline in eGFR                                                                                                                                                                                                                                                                                                                                                                                                                                                                                        | Number of patients with NSAIDs (%) | 6,346 (31.31)             | 44,622 (25.75)     |
|                                                                                                                                                                                                                                                                                                                                                                                                                                                                                                                         | Hazard Ratio (Confidence interval) | 1                         | 1.32 (1.28, 1.36)  |
| End stage renal disease                                                                                                                                                                                                                                                                                                                                                                                                                                                                                                 | Number of patients with NSAIDs (%) | 6,434 (31.74)             | 45,078 (26.01)     |
|                                                                                                                                                                                                                                                                                                                                                                                                                                                                                                                         | Hazard Ratio (Confidence interval) | 1                         | 1.94 (1.20, 3.14)  |
| End stage renal disease or >50% decline in eGFR                                                                                                                                                                                                                                                                                                                                                                                                                                                                         | Number of patients with NSAIDs (%) | 6,412 (31.63)             | 44,969 (25.95)     |
|                                                                                                                                                                                                                                                                                                                                                                                                                                                                                                                         | Hazard Ratio (Confidence interval) | 1                         | 1.47 (1.37, 1.57)  |
| <p>Hazard Ratios were obtained from Cox models adjusted for use of NSAIDs, baseline eGFR, age, race, gender, diabetes mellitus, hypertension, cardiovascular disease, peripheral artery disease, cerebrovascular disease, chronic lung disease, hepatitis C, HIV, dementia, GERD, upper GI tract bleeding, ulcer disease, H. Pylori infection, Barrett's esophagus, achalasia, stricture and esophageal adenocarcinoma<br/>NSAIDs exposure was defined as use of any NSAIDs for 30 days or more after cohort entry.</p> |                                    |                           |                    |

Supplemental table 6: Risk of renal events in a subcohort of patients where data on baseline microalbumin/creatinine ratio was available (n=29,059).

| Outcome                                                                                                                                                                                                                                                                                                                                                                                                                                                                                                                              |                                       | H2 blockers<br>(n=2,322) | PPI<br>(n=26,737)    |
|--------------------------------------------------------------------------------------------------------------------------------------------------------------------------------------------------------------------------------------------------------------------------------------------------------------------------------------------------------------------------------------------------------------------------------------------------------------------------------------------------------------------------------------|---------------------------------------|--------------------------|----------------------|
| Microalbumin<br>/creatinine<br>ratio (mg/g)                                                                                                                                                                                                                                                                                                                                                                                                                                                                                          | <20 (%)                               | 1,734 (74.68)            | 19,587 (73.26)       |
|                                                                                                                                                                                                                                                                                                                                                                                                                                                                                                                                      | 20-300 (%)                            | 539 (23.21)              | 6,547 (24.49)        |
|                                                                                                                                                                                                                                                                                                                                                                                                                                                                                                                                      | >300 (%)                              | 49 (2.11)                | 603 (2.26)           |
| Incident<br>eGFR<60<br>ml/min/1.73m <sup>2</sup>                                                                                                                                                                                                                                                                                                                                                                                                                                                                                     | Hazard Ratio<br>(Confidence interval) | 1                        | 1.22<br>(1.13, 1.32) |
| Incident<br>chronic<br>kidney<br>disease                                                                                                                                                                                                                                                                                                                                                                                                                                                                                             | Hazard Ratio<br>(Confidence interval) | 1                        | 1.33<br>(1.21, 1.47) |
| Doubling of<br>serum<br>creatinine                                                                                                                                                                                                                                                                                                                                                                                                                                                                                                   | Hazard Ratio<br>(Confidence interval) | 1                        | 1.43<br>(1.20, 1.71) |
| Greater than<br>30% decline<br>in eGFR                                                                                                                                                                                                                                                                                                                                                                                                                                                                                               | Hazard Ratio<br>(Confidence interval) | 1                        | 1.34<br>(1.24, 1.46) |
| End stage<br>renal disease                                                                                                                                                                                                                                                                                                                                                                                                                                                                                                           | Hazard Ratio<br>(Confidence interval) | 1                        | 2.82<br>(0.88, 8.98) |
| End stage<br>renal disease<br>or >50%<br>decline in<br>eGFR                                                                                                                                                                                                                                                                                                                                                                                                                                                                          | Hazard Ratio<br>(Confidence interval) | 1                        | 1.36<br>(1.17, 1.59) |
| <p>Hazard Ratios were obtained from Cox models adjusted for microalbumin/creatinine ratio, baseline eGFR, age, race, gender, diabetes mellitus, hypertension, cardiovascular disease, peripheral artery disease, cerebrovascular disease, chronic lung disease, hepatitis C, HIV, dementia, GERD, upper GI tract bleeding, ulcer disease, H. Pylori infection, Barrett's esophagus, achalasia, stricture and esophageal adenocarcinoma<br/>Microalbumin/creatinine ratio in mg/g was categorized as &lt;20, 20-300, and &gt;300.</p> |                                       |                          |                      |



Supplemental table 7: Risk of renal events in models additionally adjusted for baseline serum bicarbonate (n=174,322)

| Outcome                                                                                                                                                                                                                                                                                                                                                                                                                                                                                           |                                       | H2 blockers<br>(n=17,561) | PPI<br>(n=156,761)   |
|---------------------------------------------------------------------------------------------------------------------------------------------------------------------------------------------------------------------------------------------------------------------------------------------------------------------------------------------------------------------------------------------------------------------------------------------------------------------------------------------------|---------------------------------------|---------------------------|----------------------|
| Carbon dioxide (MEQ/L)                                                                                                                                                                                                                                                                                                                                                                                                                                                                            | Average carbon dioxide (SD)           | 26.96<br>(2.95)           | 27.02<br>(2.94)      |
| Incident eGFR<60 ml/min/1.73m <sup>2</sup>                                                                                                                                                                                                                                                                                                                                                                                                                                                        | Hazard Ratio<br>(Confidence interval) | 1                         | 1.22<br>(1.18, 1.26) |
| Incident chronic kidney disease                                                                                                                                                                                                                                                                                                                                                                                                                                                                   | Hazard Ratio<br>(Confidence interval) | 1                         | 1.28<br>(1.22, 1.35) |
| Doubling of serum creatinine                                                                                                                                                                                                                                                                                                                                                                                                                                                                      | Hazard Ratio<br>(Confidence interval) | 1                         | 1.56<br>(1.44, 1.68) |
| Greater than 30% decline in eGFR                                                                                                                                                                                                                                                                                                                                                                                                                                                                  | Hazard Ratio<br>(Confidence interval) | 1                         | 1.32<br>(1.27, 1.37) |
| End stage renal disease                                                                                                                                                                                                                                                                                                                                                                                                                                                                           | Hazard Ratio<br>(Confidence interval) | 1                         | 2.20<br>(1.28, 3.79) |
| End stage renal disease or >50% decline in eGFR                                                                                                                                                                                                                                                                                                                                                                                                                                                   | Hazard Ratio<br>(Confidence interval) | 1                         | 1.49<br>(1.38, 1.60) |
| <p>Hazard Ratios were obtained from Cox models adjusted for carbon dioxide, baseline eGFR, age, race, gender, diabetes mellitus, hypertension, cardiovascular disease, peripheral artery disease, cerebrovascular disease, chronic lung disease, hepatitis C, HIV, dementia, GERD, upper GI tract bleeding, ulcer disease, H. Pylori infection, Barrett's esophagus, achalasia, stricture and esophageal adenocarcinoma<br/> Serum bicarbonate in MEG/L was treated as a continuous variable.</p> |                                       |                           |                      |

Supplemental table 8a: Risk of renal events in models additionally adjusted for use of ACE or ARB

| Outcome                                                                                                                                                                                                                                                                                                                                                                                                                                                                                                                   |                                       | H2 blockers<br>(n=20,270) | PPI<br>(n=173,321)   |
|---------------------------------------------------------------------------------------------------------------------------------------------------------------------------------------------------------------------------------------------------------------------------------------------------------------------------------------------------------------------------------------------------------------------------------------------------------------------------------------------------------------------------|---------------------------------------|---------------------------|----------------------|
| ACE/ARB                                                                                                                                                                                                                                                                                                                                                                                                                                                                                                                   | Number of patients with ACEI/ARB (%)  | 6,086 (30.02)             | 68,890 (39.75)       |
| Incident eGFR<60 ml/min/1.73m <sup>2</sup>                                                                                                                                                                                                                                                                                                                                                                                                                                                                                | Hazard Ratio<br>(Confidence interval) | 1                         | 1.21<br>(1.17, 1.24) |
| Incident chronic kidney disease                                                                                                                                                                                                                                                                                                                                                                                                                                                                                           | Hazard Ratio<br>(Confidence interval) | 1                         | 1.26<br>(1.21, 1.32) |
| Doubling of serum creatinine                                                                                                                                                                                                                                                                                                                                                                                                                                                                                              | Hazard Ratio<br>(Confidence interval) | 1                         | 1.51<br>(1.40, 1.63) |
| Greater than 30% decline in eGFR                                                                                                                                                                                                                                                                                                                                                                                                                                                                                          | Hazard Ratio<br>(Confidence interval) | 1                         | 1.31<br>(1.27, 1.35) |
| End stage renal disease                                                                                                                                                                                                                                                                                                                                                                                                                                                                                                   | Hazard Ratio<br>(Confidence interval) | 1                         | 1.90<br>(1.18, 3.08) |
| End stage renal disease or >50% decline in eGFR                                                                                                                                                                                                                                                                                                                                                                                                                                                                           | Hazard Ratio<br>(Confidence interval) | 1                         | 1.45<br>(1.36, 1.55) |
| <p>Hazard Ratios were obtained from Cox models adjusted for use of ACE/ARB, baseline eGFR, age, race, gender, diabetes mellitus, hypertension, cardiovascular disease, peripheral artery disease, cerebrovascular disease, chronic lung disease, hepatitis C, HIV, dementia, GERD, upper GI tract bleeding, ulcer disease, H. Pylori infection, Barrett's esophagus, achalasia, stricture and esophageal adenocarcinoma<br/>ACE or ARB exposure was defined as use of either for 30 days or more before cohort entry.</p> |                                       |                           |                      |

Supplemental table 8b: Risk of renal events in models additionally adjusted for for use of ACE or ARB after cohort entry.

| Outcome                                         |                                     | H2 blockers<br>(n=20,270) | PPI<br>(n=173,321) |
|-------------------------------------------------|-------------------------------------|---------------------------|--------------------|
| Incident eGFR<60 ml/min/1.73m <sup>2</sup>      | Number of patients with ACE/ARB (%) | 8,633 (42.59)             | 81,679 (47.13)     |
|                                                 | Hazard Ratio (Confidence interval)  | 1                         | 1.22 (1.18, 1.26)  |
| Incident chronic kidney disease                 | Number of patients with ACE/ARB (%) | 8,773 (43.28)             | 83,278 (48.05)     |
|                                                 | Hazard Ratio (Confidence interval)  | 1                         | 1.29 (1.23, 1.34)  |
| Doubling of serum creatinine                    | Number of patients with ACE/ARB (%) | 9,013 (44.46)             | 86,027 (49.63)     |
|                                                 | Hazard Ratio (Confidence interval)  | 1                         | 1.53 (1.42, 1.65)  |
| Greater than 30% decline in eGFR                | Number of patients with ACE/ARB (%) | 8,801 (43.42)             | 83,564 (48.21)     |
|                                                 | Hazard Ratio (Confidence interval)  | 1                         | 1.32 (1.28, 1.37)  |
| End stage renal disease                         | Number of patients with ACE/ARB (%) | 9,050 (44.65)             | 86,785 (50.07)     |
|                                                 | Hazard Ratio (Confidence interval)  | 1                         | 1.96 (1.21, 3.17)  |
| End stage renal disease or >50% decline in eGFR | Number of patients with ACE/ARB (%) | 9,000 (44.40)             | 85,866 (49.54)     |
|                                                 | Hazard Ratio (Confidence interval)  | 1                         | 1.47 (1.38, 1.57)  |

Hazard Ratios were obtained from Cox models adjusted for use of ACE/ARB, baseline eGFR, age, race, gender, diabetes mellitus, hypertension, cardiovascular disease, peripheral artery disease, cerebrovascular disease, chronic lung disease, hepatitis C, HIV, dementia, GERD, upper GI tract bleeding, ulcer disease, H. Pylori infection, Barrett's esophagus, achalasia, stricture and esophageal adenocarcinoma  
ACE or ARB exposure was defined as use of either for 30 days or more after cohort entry.

Supplemental table 9. Distribution of PPI and H2 blockers use

| PPI*                                                                         | N (%)           |
|------------------------------------------------------------------------------|-----------------|
| Omeprazole                                                                   | 170,898 (98.60) |
| Pantoprazole                                                                 | 1,677 (0.97)    |
| Lansoprazole                                                                 | 457 (0.26)      |
| Rabeprazole                                                                  | 186 (0.11)      |
| Esomeprazole                                                                 | 103 (0.06)      |
| *PPI that a patient received as their first PPI prescription                 |                 |
| H2 blockers*                                                                 | N (%)           |
| Ranitidine                                                                   | 19,847 (97.91)  |
| Cimetidine                                                                   | 281 (1.39)      |
| Famotidine                                                                   | 142 (0.70)      |
| *H2 blockers that a patient received as their first H2 blockers prescription |                 |

Users of VA after October 1, 2006  
(N=8,434,579)

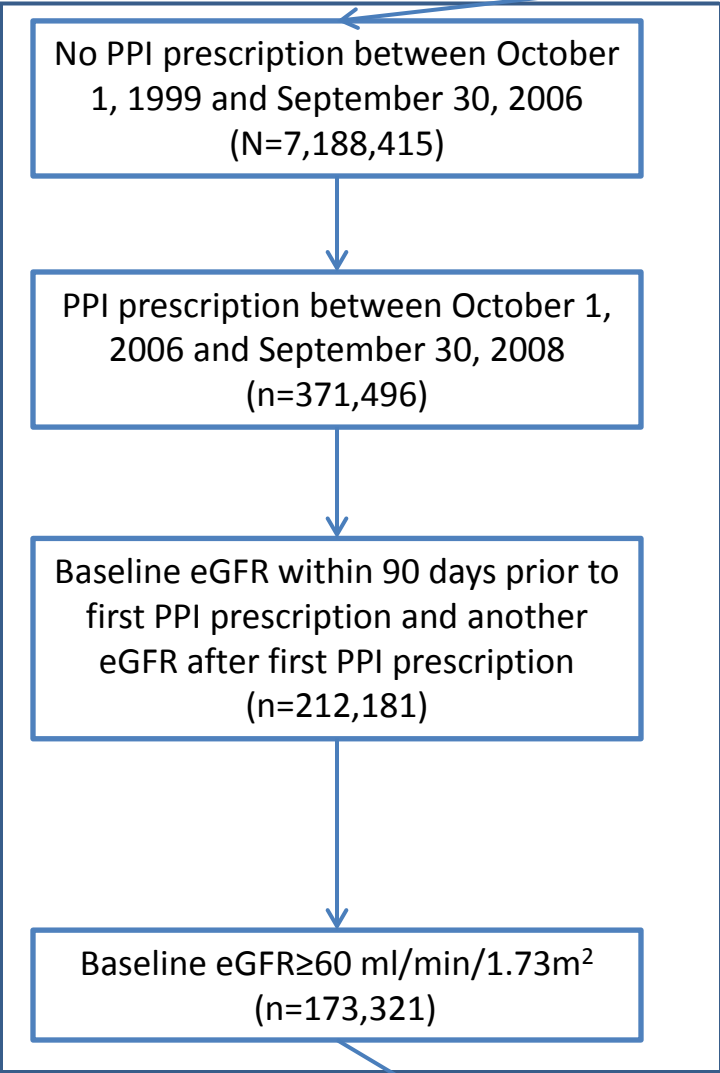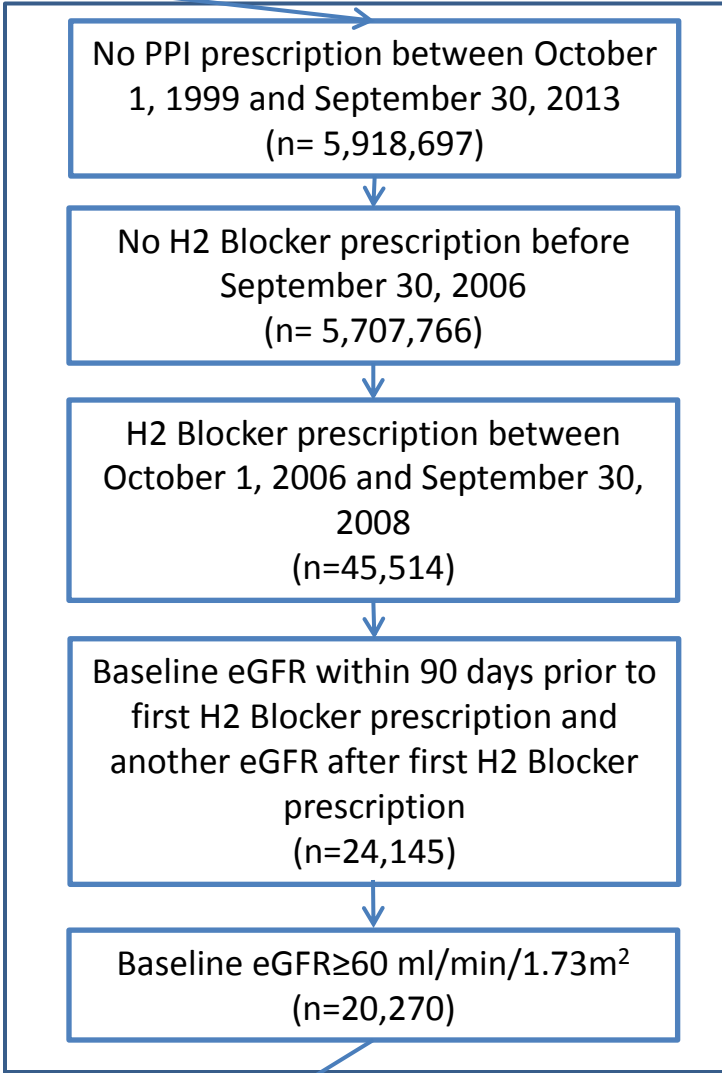

1:1 match based on propensity score  
(N=40,540)

Users of VA after October 1, 2006  
(N=8,434,579)

No PPI prescription  
Between October 1, 1999 and October 1, 2006  
(N=7,188,415)

PPI prescription  
between October 1, 2006 and  
September 30, 2008  
(n=371,496)

Baseline eGFR within 90 days prior to  
first PPI prescription and another  
eGFR after first PPI prescription  
(n=212,181)

Baseline eGFR  $\geq 60$  ml/min/1.73m<sup>2</sup>  
(n=173,321)

No PPI prescription between October  
1, 2006 and September 30, 2008  
(n= 6,816,919)

Baseline eGFR between October 1,  
2006 and September 30, 2008, and  
another eGFR after baseline  
measurement  
(n=1,720,495)

Outpatient visit within 90 days after  
baseline eGFR  
(n=1,426,792)

Baseline eGFR  $\geq 60$  ml/min/1.73m<sup>2</sup>  
(n=1,169,499)

1:1 match based on  
propensity score  
(N=346,642)

PPI

Control
